# Supplementary material for: Assessing the European Electric-Mobility Transition: Emissions from Electric Vehicle Manufacturing and Use in Relation to the EU Greenhouse Gas Emission Targets
Source: PubMed Central journal article supplement (PMC9836351; doi:10.1021/acs.est.2c06304), 2022-12-27
Supplement: es2c06304_si_001.pdf [file es2c06304_si_001.pdf]

1 Supporting Information

2 Assessing the European Electric-Mobility Transition: Emissions from Electric Vehicle  
3 Manufacturing and Use in Relation to the EU Greenhouse Gas Emission Targets

4  
5 Chen Tang<sup>1\*</sup>, Arnold Tukker<sup>1,2</sup>, Benjamin Sprecher<sup>3</sup>, José M. Mogollón<sup>1</sup>

6  
7 <sup>1</sup>Institute of Environmental Sciences, Leiden University, Leiden, 2333 CC, The Netherlands

8 <sup>2</sup>Netherlands Organization for Applied Scientific Research (TNO), The Hague, 2595 DA, The Netherlands

9 <sup>3</sup>Faculty of Industrial Design Engineering, Delft University of Technology, Delft, 2628 CE, The Netherlands

10  
11  
12  
13  
14  
15  
16  
17  
18  
19  
20 Supporting information includes: 20 pages, 10 Tables, and 9 Figures.

21  

---

  
\* Correspondence: Chen Tang (c.tang@cml.leidenuniv.nl)

|    |                                                                 |     |
|----|-----------------------------------------------------------------|-----|
| 22 | Contents:                                                       |     |
| 23 | SI.1 Dynamic MFA model .....                                    | S3  |
| 24 | SI.2 Assessment of GHG emissions .....                          | S7  |
| 25 | SI.2.1 GHG emissions from passenger vehicle manufacturing ..... | S7  |
| 26 | SI.2.2 GHG emissions from passenger vehicle use .....           | S11 |
| 27 | SI.3 Uncertainty analysis .....                                 | S13 |
| 28 | SI.4 Additional results .....                                   | S14 |
| 29 | SI.5 Lifespan extension .....                                   | S14 |
| 30 | Reference: .....                                                | S16 |
| 31 |                                                                 |     |
| 32 |                                                                 |     |

33 **SI.1 Dynamic MFA model**

34 Four types of passenger vehicles were included in this study: Battery Electric Vehicles (BEVs), Plug-in Hybrid  
 35 Electric Vehicles (PHEVs), Hybrid Electric Vehicles (HEVs), Internal Combustion Engine Vehicles powered by  
 36 gasoline (ICEV-G) or diesel (ICEV-D). The future stock of passenger vehicles for each country was estimated  
 37 from historical registration data collected from the Eurostat<sup>1</sup> and the European Automobile Manufacturers  
 38 Association (ACEA)<sup>2</sup> by assuming a vehicle-to-population ratio and future population growth from the Shared  
 39 Socio-economic Pathway, SSP2<sup>3</sup> (Figure S1 (A)). The SSP2 scenario outlines a middle-of-the-road scenario in  
 40 terms of socioeconomic development. It represents moderate population growth and a path in which “social,  
 41 economic, and technological trends do not shift markedly from historical patterns”<sup>3</sup>. The projected population  
 42 data was collected from the SSP database<sup>4</sup>, and presented at the 2-year intervals in Table S1.

43 The market share of various passenger vehicle types was calculated based on the annual numbers of registered  
 44 passenger vehicles for recent years (2011-2020) collected from the ACEA<sup>2</sup>. The assumptions from 2021 for each  
 45 country were fitted by the individual future policy targets of EVs (BEVs and PHEVs) and the same historical  
 46 sales trend of HEVs and ICEVs, as shown in Figure S1 (B). The market share of ICEV-P was assumed to be  
 47 double that of ICEV-D following the historical sales statistics<sup>2</sup>. For the scenario with a more ambitious e-  
 48 mobility transition, BEVs would fully dominate the market of passenger vehicles by 2030 within all the 27 EU  
 49 + 3 countries. Best-selling EV models within the 27 EU + 3 countries by 2020 were listed in Table S2.

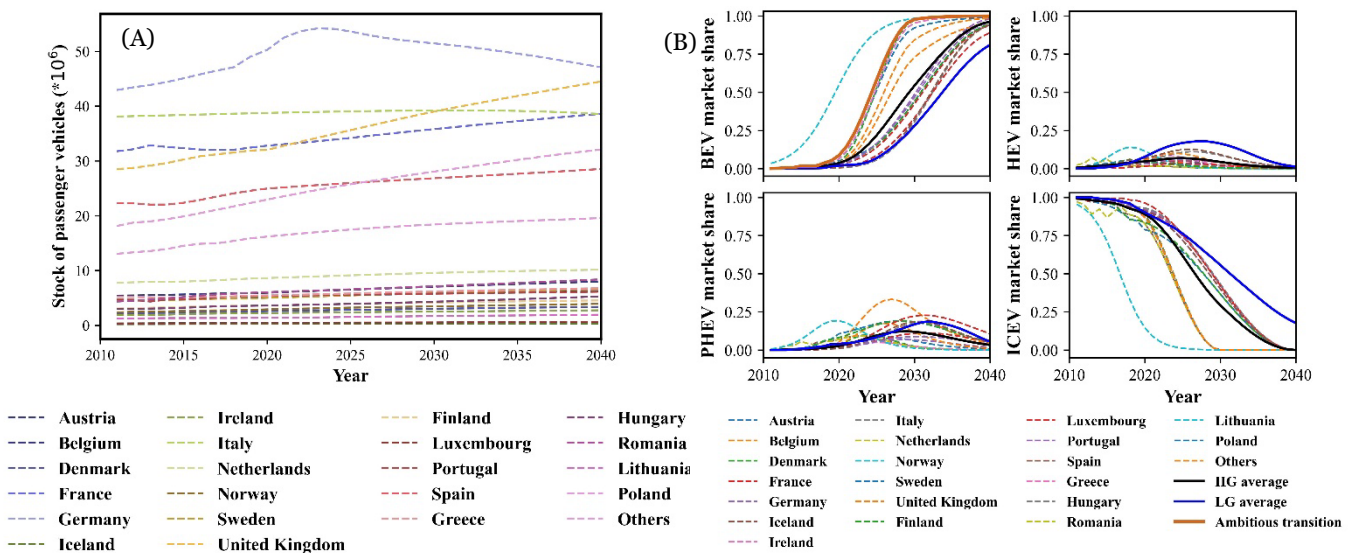

50 Figure S1. (A) The estimated total stock of passenger vehicles for the 27 EU + 3 countries through 2040. (B) Market share for BEVs, HEVs,  
 51 PHEVs, and ICEVs of the 27 EU + 3 countries through 2040 following the individual stated e-mobility plans (dashed lines). Solid lines in  
 52 black and blue represent the average level of the countries in the high ambition group (HG) and low ambition group (LG) following the  
 53 stated e-mobility transition. The solid line in brown represents the market share of BEVs for the 27 EU + 3 countries in the ambitious  
 54 transition scenario. (“Others” represents the countries in the low ambition group with the lowest goals in market share of EVs.)

Table S1. Projected population data in European countries (unit: million)<sup>4</sup>

| Year           | 2020  | 2022  | 2024  | 2026  | 2028  | 2030  | 2032  | 2034  | 2036  | 2038  | 2040  |
|----------------|-------|-------|-------|-------|-------|-------|-------|-------|-------|-------|-------|
| Austria        | 8.70  | 8.75  | 8.81  | 8.86  | 8.90  | 8.95  | 8.99  | 9.02  | 9.05  | 9.08  | 9.11  |
| Belgium        | 11.27 | 11.37 | 11.48 | 11.58 | 11.68 | 11.78 | 11.87 | 11.96 | 12.05 | 12.14 | 12.22 |
| Denmark        | 5.81  | 5.86  | 5.92  | 5.97  | 6.03  | 6.09  | 6.14  | 6.19  | 6.24  | 6.29  | 6.34  |
| France         | 69.00 | 69.77 | 70.60 | 71.40 | 72.18 | 72.94 | 73.69 | 74.43 | 75.15 | 75.84 | 76.52 |
| Germany        | 81.91 | 81.82 | 81.73 | 81.63 | 81.50 | 81.36 | 81.19 | 81.01 | 80.81 | 80.60 | 80.37 |
| Iceland        | 0.36  | 0.36  | 0.37  | 0.37  | 0.38  | 0.38  | 0.39  | 0.39  | 0.39  | 0.39  | 0.40  |
| Ireland        | 5.04  | 5.14  | 5.24  | 5.33  | 5.42  | 5.51  | 5.60  | 5.69  | 5.78  | 5.87  | 5.96  |
| Italy          | 61.70 | 61.76 | 61.81 | 61.87 | 61.91 | 61.95 | 61.99 | 62.02 | 62.04 | 62.04 | 62.02 |
| Netherlands    | 17.26 | 17.40 | 17.53 | 17.65 | 17.77 | 17.88 | 17.99 | 18.08 | 18.17 | 18.24 | 18.31 |
| Norway         | 5.43  | 5.54  | 5.66  | 5.77  | 5.89  | 6.00  | 6.12  | 6.23  | 6.33  | 6.44  | 6.54  |
| Sweden         | 10.19 | 10.35 | 10.52 | 10.68 | 10.84 | 10.99 | 11.13 | 11.27 | 11.41 | 11.56 | 11.71 |
| United Kingdom | 66.21 | 67.01 | 67.80 | 68.57 | 69.32 | 70.04 | 70.74 | 71.41 | 72.08 | 72.74 | 73.40 |
| Finland        | 5.62  | 5.67  | 5.71  | 5.76  | 5.80  | 5.85  | 5.88  | 5.92  | 5.95  | 5.98  | 6.01  |
| Luxembourg     | 0.59  | 0.61  | 0.63  | 0.64  | 0.66  | 0.68  | 0.69  | 0.71  | 0.73  | 0.74  | 0.76  |
| Portugal       | 10.91 | 10.95 | 10.98 | 11.02 | 11.05 | 11.08 | 11.11 | 11.15 | 11.18 | 11.21 | 11.23 |
| Spain          | 48.77 | 49.09 | 49.39 | 49.67 | 49.94 | 50.21 | 50.49 | 50.78 | 51.07 | 51.38 | 51.68 |
| Poland         | 38.41 | 38.37 | 38.31 | 38.20 | 38.07 | 37.89 | 37.67 | 37.42 | 37.16 | 36.87 | 36.59 |
| Hungary        | 9.73  | 9.68  | 9.64  | 9.59  | 9.54  | 9.49  | 9.43  | 9.38  | 9.32  | 9.26  | 9.20  |
| Romania        | 20.77 | 20.61 | 20.44 | 20.27 | 20.09 | 19.92 | 19.73 | 19.54 | 19.35 | 19.14 | 18.94 |
| Lithuania      | 3.19  | 3.16  | 3.14  | 3.11  | 3.08  | 3.05  | 3.02  | 2.98  | 2.95  | 2.91  | 2.88  |
| Greece         | 11.43 | 11.42 | 11.41 | 11.40 | 11.39 | 11.38 | 11.37 | 11.37 | 11.36 | 11.36 | 11.35 |
| Czech          | 10.97 | 11.05 | 11.12 | 11.19 | 11.24 | 11.29 | 11.33 | 11.37 | 11.40 | 11.44 | 11.48 |
| Slovakia       | 5.61  | 5.63  | 5.65  | 5.66  | 5.67  | 5.67  | 5.66  | 5.65  | 5.64  | 5.63  | 5.61  |
| Croatia        | 4.34  | 4.32  | 4.31  | 4.29  | 4.28  | 4.26  | 4.24  | 4.22  | 4.20  | 4.19  | 4.17  |
| Cyprus         | 1.25  | 1.28  | 1.30  | 1.33  | 1.35  | 1.38  | 1.40  | 1.42  | 1.44  | 1.46  | 1.48  |
| Malta          | 0.43  | 0.44  | 0.44  | 0.44  | 0.44  | 0.44  | 0.45  | 0.45  | 0.45  | 0.45  | 0.45  |
| Bulgaria       | 7.07  | 7.00  | 6.93  | 6.87  | 6.81  | 6.75  | 6.70  | 6.65  | 6.60  | 6.55  | 6.51  |
| Estonia        | 1.33  | 1.32  | 1.31  | 1.31  | 1.30  | 1.30  | 1.29  | 1.29  | 1.28  | 1.28  | 1.27  |
| Latvia         | 2.12  | 2.10  | 2.08  | 2.06  | 2.04  | 2.02  | 2.00  | 1.98  | 1.96  | 1.94  | 1.93  |
| Slovenia       | 2.09  | 2.10  | 2.11  | 2.12  | 2.13  | 2.14  | 2.14  | 2.15  | 2.15  | 2.16  | 2.17  |

57 The lifespan of passenger vehicles determines their survival time in the dynamic MFA model. The lifespan was  
 58 assumed to follow a Weibull distribution function with scale and shape parameters ( $\lambda$  and  $k$ ), as shown below:

59 
$$f(T, \tau, k, \lambda) = 1 - e^{-\left(\frac{T-\tau}{\lambda}\right)^k}$$

60 The average lifespan of the passenger vehicles for each country was based on a previous study<sup>5</sup>, representing the  
 61 historical turnover frequency of passenger vehicles. Overall, the average lifespan of the counties in the high  
 62 ambition group was about 18.4 years, whereas for countries in the low ambition group it was about 24.8 years.  
 63 The scale and shape parameters ( $\lambda$  and  $k$ ) are listed in Table S3.

64 However, the average lifespan of EVs is about 12 years as suggested by many EV automakers<sup>6</sup>, representing a  
 65 survival probability of about 50% after 10.2 years (Figure S2 (A)). Considering the mismatch of lifespans  
 66 between the conventional ICEVs and the EVs, and we made different assumptions on the lifespans in different  
 67 scenarios for the assessment in the scenario years (from 2021 onwards). In the no e-mobility scenario and stated  
 68 transition scenario, the average lifespan of ICEVs in each country was assumed to follow the historical values,  
 69 and the average lifespan of EVs was assumed to be 12 years. In the more ambitious, however, with EVs rapidly  
 70 dominating the sales market, the average lifespan was assumed to be 12 years for all vehicle types, which  
 71 accounts for an accelerated phase-out of ICEVs to a lower lifespan of 12 years. However, for the specific case of  
 72 Luxemburg the average lifespan for all passenger vehicles in all scenarios was assumed to follow their historical  
 73 turnover frequency as 8 years. The annual demand for all types of passenger vehicles in different scenarios is  
 74 shown in Figure S2 (B).

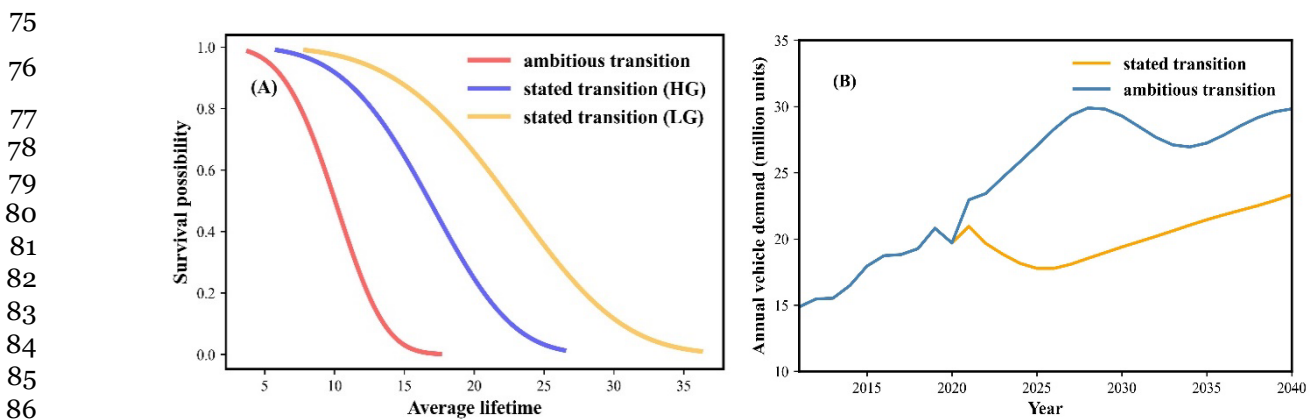

88 Figure S2. (A) Survival possibility distribution for the average lifespan of passenger vehicles in the stated transition scenario and in the  
 89 ambitious transition scenario. (B) Annual demand for all types of passenger vehicles in the stated transition scenario and in the  
 90 ambitious transition scenario.

91

Table S2. Top sale EV models in European countries by 2020

| Vehicle type | EV model             | Launched time | Total sales | Battery cathode chemistry | Battery capacity (kWh) | Stated driving range (km) |
|--------------|----------------------|---------------|-------------|---------------------------|------------------------|---------------------------|
| BEV          | Mitsubishi i-MiEV    | 2010          | 8119        | LMO-poly                  | 16                     | 85                        |
|              | Peugeot i-On         | 2010          | 13823       | LMO-poly                  | 14.5                   | 85                        |
|              | Citroën C-Zero       | 2010          | 14314       | LMO-poly                  | 14.5                   | 85                        |
|              | Nissan LEAF (2011)   | 2011          | 81811       | LMO-poly                  | 24/30                  | 125                       |
|              | Renault Zoe (2012)   | 2012          | 89389       | LMO-poly                  | 26                     | 140                       |
|              | BMW i3 (2013)        | 2013          | 95548       | LMO-poly                  | 22                     | 130                       |
|              | Tesla Model S        | 2013          | 78541       | NCA                       | 75-100                 | 330-490                   |
|              | SMART-for Two/Four   | 2013          | 54022       | NMC-111                   | 17                     | 101                       |
|              | KIA soul             | 2014          | 30887       | LMO-poly                  | 32                     | 170                       |
|              | Volkswagen e-Golf    | 2015          | 117475      | NMC-111                   | 24                     | 130                       |
|              | Tesla Model X        | 2016          | 39978       | NCA                       | 60-100                 | 330-490                   |
|              | Hyundai ioniq        | 2016          | 36237       | NMC-622                   | 28                     | 190                       |
|              | Tesla Model 3        | 2017          | 181147      | NCA                       | 85-100                 | 350-500                   |
|              | Jaguar I-pace        | 2017          | 31970       | NMC-622                   | 90                     | 415                       |
|              | Renault Zoe (2017)   | 2017          | 212657      | NMC-622                   | 41                     | 255                       |
|              | Nissan LEAF (2018)   | 2018          | 101709      | NMC-622                   | 40                     | 245                       |
|              | Hyundai Kona         | 2018          | 73904       | NMC-622                   | 39.2                   | 246                       |
|              | AUDI e-Tron          | 2018          | 54022       | NMC-622                   | 71.2                   | 330                       |
|              | Volkswagen ID.3      | 2020          | 54495       | NMC-622                   | 45                     | 275                       |
|              | Peugeot e-208        | 2020          | 31287       | NMC-622                   | 45                     | 275                       |
| PHEV         | Mitsubishi Outlander | 2013          | 185458      | LMO/NMC                   | 12                     | --                        |
|              | Volvo V60 Plug-in    | 2013          | 41693       | NMC-111                   | 10.4                   | --                        |
|              | Volkswagen Golf      | 2014          | 58271       | NMC-111                   | 8.8                    | --                        |
|              | Volkswagen Passat    | 2014          | 69189       | NMC-111                   | 10                     | --                        |
|              | AUDI Q5              | 2019          | 21099       | NMC-622                   | 14.1                   | --                        |
|              | Ford Kuga            | 2020          | 22628       | NMC-622                   | 14.4                   | --                        |

93

94

Table S3. Historical average lifespan of passenger vehicles for each country<sup>5</sup>

95

96

| Country     | Lifespan ( $\lambda, k$ ) | Country        | Lifespan ( $\lambda, k$ ) | Country  | Lifespan ( $\lambda, k$ ) |
|-------------|---------------------------|----------------|---------------------------|----------|---------------------------|
| Austria     | 15.9, 3.4                 | Sweden         | 19.4, 4.9                 | Greece   | 33.9, 4.2                 |
| Belgium     | 11.7, 2.0                 | United Kingdom | 14.2, 4.0                 | Czech    | 15.4, 3.6                 |
| Denmark     | 16.9, 3.4                 | Finland        | 24.9, 3.2                 | Slovakia | 24.8, 4.03                |
| France      | 15.2, 6.0                 | Luxembourg     | 8.0, 2.0                  | Croatia  | 30.9, 6.0                 |
| Germany     | 14.8, 2.4                 | Portugal       | 23.1, 6.0                 | Cyprus   | 24.8, 4.03                |
| Iceland     | 19.7, 4.3                 | Spain          | 19.4, 3.2                 | Malta    | 24.8, 4.03                |
| Ireland     | 15.0, 4.3                 | Hungary        | 23.1, 6.0                 | Bulgaria | 24.8, 4.03                |
| Italy       | 19.6, 2.7                 | Romania        | 24.8, 4.03                | Estonia  | 24.8, 4.03                |
| Norway      | 19.8, 6.0                 | Lithuania      | 24.8, 4.03                | Latvia   | 24.8, 4.03                |
| Netherlands | 17.2, 4.4                 | Poland         | 24.8, 4.03                | Slovenia | 20.0, 6.0                 |

97 SI.2 Assessment of GHG emissions  
 98 SI.2.1 GHG emissions from passenger vehicle manufacturing

99 The GHG emissions from the production of passenger vehicles were calculated by multiplying the total annual  
 100 demand of various passenger vehicles with their GHG emission factors per unit. We chose the lower-medium  
 101 size as the average model of the passenger cars, as they have been among the most commonly sold in European  
 102 countries in recent years<sup>7</sup>. The description of the passenger vehicles powered by different fuel types was listed  
 103 in Table S4. The production GHG emission factors per manufactured unit for the assessment in the historical  
 104 years (from 2011 to 2020) were based on the previous studies<sup>8-14</sup>. They were adjusted to correspond to the  
 105 reference models of the passenger vehicles involved in our study, as listed in Table S4.

106 Table S4. Passenger vehicle description and historical GHG emission factors for manufacturing process<sup>8-14</sup>

| Passenger vehicle type | Description                                                                                                                                                                                                                                            | Main components of the passenger vehicles                                                                                         | GHG emission factors in 2011 |
|------------------------|--------------------------------------------------------------------------------------------------------------------------------------------------------------------------------------------------------------------------------------------------------|-----------------------------------------------------------------------------------------------------------------------------------|------------------------------|
| ICEV-G                 | ICEV-G refers to the current most common vehicle technology that burns gasoline to power an engine, with an average weight of 1280 kg per unit.                                                                                                        | General glider, powertrain, wheels, transmission, others (e.g. PbA batteries, fluids).                                            | 7948 kg/ unit                |
| ICEV-D                 | ICEV-D refers to a vehicle that burns diesel to power an engine, with an average weight of 1280 kg per unit.                                                                                                                                           | General glider, powertrain, wheels, transmission, others (e.g. PbA batteries, fluids).                                            | 7948 kg/ unit                |
| BEV                    | BEV is powered solely by an electric motor drawing a rechargeable EV battery pack, with an average weight of 1320 kg per unit (including a 22 kWh EV battery pack).                                                                                    | General glider, electric motor and controller, wheels, EV battery pack, others (e.g. fluids).                                     | 10167 kg / unit              |
| PHEV                   | PHEV is a hybrid electric vehicle that has the capability to charge the battery from an off-vehicle electric source, with an average weight of 1400 kg per unit. The probability of the user operating PHEVs in electric mode is set as 0.5.           | General glider, powertrain, electric motor and controller, transmission, wheels, EV battery, others (e.g. PbA batteries, fluids). | 10324 kg /unit               |
| HEV                    | HEV draws propulsion energy from both an internal combustion engine or heat engine using consumable fuel, and a piece of rechargeable battery pack getting energy solely from sources onboard the vehicle, with an average weight of 1340 kg per unit. | General glider, powertrain, electric motor and controller, transmission, wheels, EV battery, others (e.g. PbA batteries, fluids). | 9447 kg / unit               |

107

108 For the assessment in the scenario years, the use of historical GHG intensity data as aforementioned would  
 109 create a bias since EV manufacturing has been dominated by countries outside the EU (e.g. China, Japan, Korea  
 110 and the US)<sup>15</sup>. It is however likely that in future EV production in the EU will catch up. Moreover, the GHG  
 111 emissions factor of BEVs was also determined by the EV battery capacity<sup>9–13,16–23</sup>. Therefore, we assumed  
 112 dynamic manufacturing GHG emission factors for the scenario years related to the change of electricity  
 113 consumption (from 2021 to 2040), determined by the allocation of passenger vehicle manufacturing countries,  
 114 related reduction of GHG emissions from the electricity generation in those countries, and the dynamic change  
 115 of average EV battery capacity for EVs. The average electricity consumption for various types of passenger  
 116 vehicles and EV battery manufacturing are listed in Table S5. The GHG emissions related to other forms of  
 117 energy consumption were assumed to remain constant in time for all passenger vehicles and the EV battery pack  
 118 (listed in Table S5)<sup>18–21,24–28</sup>.

119 Table S5. Average electricity consumption for passenger vehicle manufacturing

| Vehicle type and EV battery | Electricity consumption from manufacturing process | GHG emission factor from other forms of energy consumption | References                                                                                                              |
|-----------------------------|----------------------------------------------------|------------------------------------------------------------|-------------------------------------------------------------------------------------------------------------------------|
| ICEV-G                      | 7257 kWh / unit                                    | 4882 kg/ unit                                              | Moreno <sup>14</sup> ; Hawkins et al. <sup>20</sup>                                                                     |
| ICEV-D                      | 7257 kWh / unit                                    | 4882 kg/ unit                                              | Moreno <sup>14</sup> ; Hawkins et al. <sup>20</sup>                                                                     |
| BEV (without EV battery)    | 6580 kWh / unit                                    | 4562 kg /unit                                              | Moreno <sup>14</sup> ; Hawkins et al. <sup>20</sup>                                                                     |
| PHEV (without EV battery)   | 8424 kWh / unit                                    | 5353 kg/unit                                               | Moreno <sup>14</sup> ; Milovanoff et al. <sup>24</sup> ; Majeau-Bettez et al. <sup>25</sup> ; Onat et al. <sup>28</sup> |
| HEV (without EV battery)    | 8239 kWh / unit                                    | 5277 kg/unit                                               | Moreno <sup>14</sup> ; Milovanoff et al. <sup>24</sup>                                                                  |
| EV battery pack             | 120 kWh / kWh battery capacity                     | 47.2 kg/ kWh battery capacity                              | Moreno <sup>14</sup> ; Sun et al. <sup>21</sup> ; Dai et al. <sup>26</sup> . Ellingsen et al. <sup>18,27</sup>          |

120  
 121 The distribution of manufacturing countries for different scenarios was assumed based on the EU historical  
 122 import statistics of various passenger vehicles in the 2010s collected from ACEA<sup>2</sup>. For the no e-mobility scenario,  
 123 the prospective allocation of manufacturing countries was assumed to remain constant until 2040. For the  
 124 scenarios in which EVs promotion would take place (stated transition scenario and ambitious transition  
 125 scenario), we assumed an annual increase of 1% in EV production within the EU, while the remaining demand  
 126 for EVs was assumed to be supplied by non-EU countries according to their historical manufacture market  
 127 shares<sup>29</sup>, as listed in Table S6. The manufacturing allocation of ICEVs and HEVs in these two scenarios was  
 128 assumed to keep the same trend as in the historical years.

129



130

Table S6. Allocation of the manufacturing countries for various passenger vehicles in different scenarios

| Vehicle type   | Historical allocation of the manufacturing countries (from 2011 to 2020) <sup>2,29</sup>          | Prospective allocation of the manufacturing countries (from 2021 to 2040)                                                                                                                                                                  |
|----------------|---------------------------------------------------------------------------------------------------|--------------------------------------------------------------------------------------------------------------------------------------------------------------------------------------------------------------------------------------------|
| ICEVs and HEVs | 27 EU + 3 countries (65%),<br>Japan (10%), Turkey (8%),<br>Korea (6%), The U.S. (6%), Others (5%) | No e-mobility scenario: same trend as historical years.<br>Scenarios with EV promotion: same trend as historical years.                                                                                                                    |
| PHEVs and BEVs | China (39.5%), Korea (32%),<br>Japan (15%), The U.S. (13.5%)                                      | No e-mobility scenario: same trend as historical years.<br>Scenarios with EV promotion: An annual increase of 1% in manufacturing share within the EU, with non-EU manufacturing keeping the historical market share of exports to the EU. |

131

132 The choice of electricity sources (electricity mixes) has a significant impact on the GHG emissions from  
 133 electricity generation. In this study, we therefore took the historical data (the year 2011-2019) of electricity mixes  
 134 of manufacturing countries from the statistics data offered by IEA<sup>30</sup> and the estimated energy mixes (from the  
 135 year 2020 onwards) based on the “stated policies scenario” and “sustainable development scenario” from IEA  
 136 Energy Outlook 2020<sup>31</sup>. The IEA scenarios included the forecast for the share and compound average annual  
 137 growth rate (CAAGR) of each resource until 2040. The electricity mixes for the scenarios were assigned based  
 138 on the contribution share to the future goal of the total electricity production volume from each country (Figure  
 139 S3). Eight major resources for electricity generation and the carbon equivalent emission factors for each source  
 140 were taken from the previous study<sup>32</sup> and listed in Table S7.

141

142

143

144

145

146

147

148

149

150

151

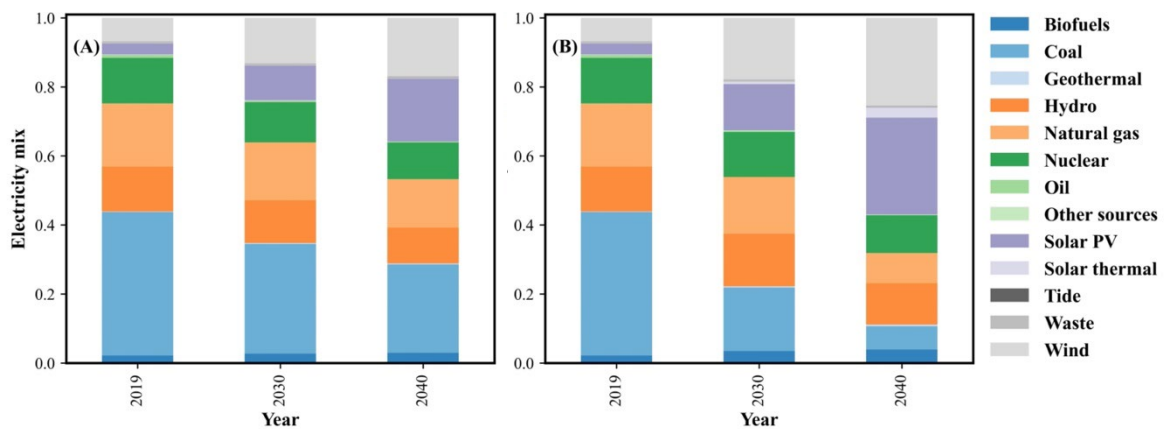

Figure S3. Integrated electricity mix of all passenger vehicle manufacturing countries in 2019, 2030 and 2040, for (A) the stated transition scenario, and (B) the ambitious transition scenario. The allocation of the manufacturing countries was described in Table S6 and the electricity mix in 2030 and 2040 followed the prediction by the “stated policy scenario” and “sustainable development scenario” in the report from IEA<sup>31</sup>.

152

Table S7. GHG emission factors of different types of fuel in electricity generation<sup>32</sup>

| Fuel type                                        | Biomass | Coal | Oil | Natural gas | Solid waste | Wind | Solar | Nuclear | Hydropower |
|--------------------------------------------------|---------|------|-----|-------------|-------------|------|-------|---------|------------|
| GHG emission factors (g CO <sub>2</sub> -eq/kWh) | 230     | 820  | 730 | 490         | 52          | 11   | 44    | 12      | 24         |

153

154 The average battery capacity of BEVs from 2011 to 2020 was calculated based on the manufacturing reports of  
 155 the most popular BEV models sold in EU countries (Table S2). The future battery capacity of BEVs (from 2021  
 156 to 2040) was estimated at around 80 kWh by assuming an extended driving range of 550 km<sup>19</sup>, as shown in  
 157 Figure S4. For PHEVs, their average battery capacity was assumed as 12 kWh<sup>33</sup>, remaining constant through  
 158 2040.

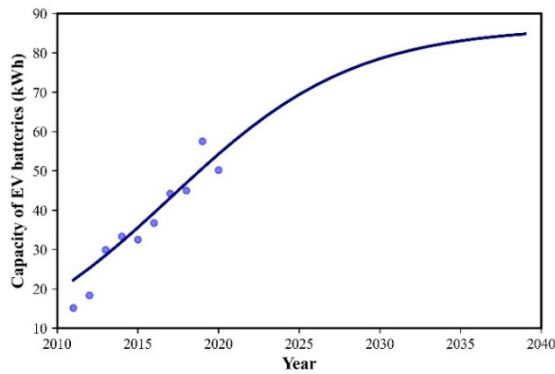

163

164

165 Figure S4. Estimated power capacity of EV battery used in BEVs based on a driving range assumptions of 550 km. The scatters represent  
 166 average battery power capacity of the lunched BEV models by 2020 as listed in Table S2.

167

168 With all the aforementioned assumptions, the manufacturing GHG emission factor for different scenarios were  
 169 calculated for per unit various passenger vehicle and shown in Figures S5.

170

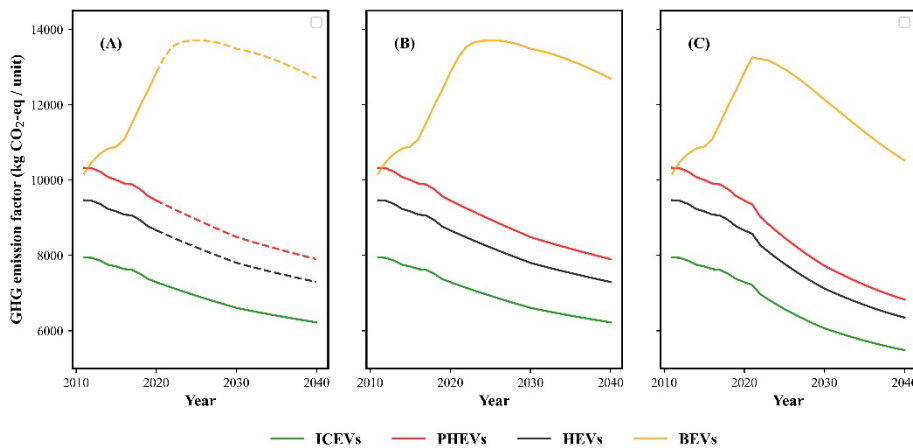

171

172

173

174

175

176

177

178

179

180

181

182

183 Figure S5. Production GHG emission factors per unit passenger vehicle for (A) no e-mobility scenario, (B) stated transition scenario, and  
 184 (C) ambitious transition scenario.

## 185 SI.2.2 GHG emissions from passenger vehicle use

186 The annual emissions from the in-use passenger vehicles were assessed by multiplying the total annual traveled  
187 distance (Vehicle Kilometer Travel, VKT, listed in Table S8) with the energy consumption of different types of  
188 passenger vehicles and with the respective emission factors related to fuel type or electricity use. The  
189 assumptions on their average in-use energy consumption from 2010 to 2040 were listed in Table S9.

190 In our model, we incorporated a decrease in fuel consumption of new ICEVs due to the improved technologies  
191 toward 2040. Using the historical fuel consumption values in 2000 as the initial values (7.6 L /100 km for petrol  
192 and 6.2 L /100 km for diesel), the fuel consumption remained annually decreased at the rate of 1.14% and 1.34%  
193 for petrol and diesel<sup>34</sup>. Emission factors of the passenger vehicles with fuel consumption (ICEVs, HEVs and  
194 PHEVs) were 2.31 kg CO<sub>2</sub>-eq / L and 2.69 kg CO<sub>2</sub>-eq / L for petrol and diesel, taken from a previous study<sup>12</sup>.

195 The fuel consumption of HEVs is 30% – 50% less than that of a comparable ICEVs and was also assumed to  
196 remain constant until 2040, as hybrid systems have been taken as a bridge to meeting tougher tailpipe-  
197 emissions requirements and the automakers are focusing more on the zero-emission passenger vehicles (e.g.,  
198 BEVs)<sup>35</sup>.

199 The total energy consumption of PHEVs depends strongly on the driving and charging patterns of vehicle users  
200 to choose the driving mode, and it is hard to precisely estimate. Therefore, we set the parameter of this  
201 probability as 0.5, which means that half of the total energy consumption per traveled distance contributes from  
202 the electricity and the other half contributes from fuel (only gasoline-electricity PHEVs were considered in this  
203 study). The energy consumption of PHEVs was taken from the previous study and assumed to be constant until  
204 2040<sup>10</sup>.

205 For the BEVs, the average electric energy consumption from basic driving and charging loss<sup>12</sup>, was assumed to  
206 be dynamic following the changes in the EV battery capacity as shown in Figure S4. The energy consumption  
207 for BEVs was calculated based on an average of 5.4 Wh per additional 100 kilograms in vehicle weight, as  
208 demonstrated by a previous study<sup>18</sup>. The weight changes in glider size were negligible compared to the changes  
209 in EV battery weight and thus were neglected in this study. Other factors such as motor efficiency, cargo load  
210 and driving behavior were not included. The electricity mixes of each EU country in the scenario years were  
211 assumed to follow the IEA scenarios<sup>31</sup>, as shown in Figure S6.

Table S8. Annual distance travelled (VKT) by the passenger vehicle for each country<sup>36</sup>

| Country     | VKT (km) | Country        | VKT (km) | Country  | VKT (km) |
|-------------|----------|----------------|----------|----------|----------|
| Austria     | 14100    | Sweden         | 12000    | Greece   | 11500    |
| Belgium     | 14770    | United Kingdom | 12000    | Czech    | 8000     |
| Denmark     | 16000    | Finland        | 15000    | Slovakia | 8000     |
| France      | 12000    | Luxembourg     | 14000    | Croatia  | 16000    |
| Germany     | 14700    | Portugal       | 13060    | Cyprus   | 11000    |
| Iceland     | 10500    | Spain          | 12500    | Malta    | 8000     |
| Ireland     | 17000    | Hungary        | 13000    | Bulgaria | 7000     |
| Italy       | 10500    | Romania        | 10000    | Estonia  | 14000    |
| Norway      | 15000    | Lithuania      | 12000    | Latvia   | 11000    |
| Netherlands | 13200    | Poland         | 8000     | Slovenia | 8000     |

Table S9. Passenger vehicle type description and average energy consumption of in-use phase

| Vehicle type | Fuel type                                              | Average driving energy consumption                                                                               | References                                                                                                                             |
|--------------|--------------------------------------------------------|------------------------------------------------------------------------------------------------------------------|----------------------------------------------------------------------------------------------------------------------------------------|
| ICEV-G       | Unleaded petrol E5 (L)                                 | 6.8 L / 100 km in 2011<br>6.1 L / 100 km in 2020<br>5.5 L / 100 km in 2030<br>4.9 L / 100 km in 2040             | Molovanoff et al. <sup>10</sup> ;<br>Küfeoğlu et al. <sup>12</sup> ;<br>Uson et al. <sup>34</sup> ;<br>Sihvonen et al. <sup>35</sup> ; |
| ICEV-D       | Diesel fuel B7 (L)                                     | 5.4 L / 100 km in 2011<br>4.7 L / 100 km in 2020<br>4.2 L / 100 km in 2030<br>3.7 L / 100 km in 2040             | Molovanoff et al. <sup>10</sup> ;<br>Uson et al. <sup>34</sup> ;<br>Sihvonen et al. <sup>35</sup> ;                                    |
| BEV          | Electricity (kWh)                                      | 15.6 kWh / 100 km in 2011<br>16.8 kWh / 100 km in 2020<br>17.6 kWh / 100 km in 2030<br>17.9 kWh / 100 km in 2040 | Ellingsen et al. <sup>18</sup> ;<br>Zhang et al. <sup>37</sup> ;<br>Cox et al. <sup>38</sup>                                           |
| PHEV         | Only unleaded petrol E5 (L)+<br>Only electricity (kWh) | 6.7 L / 100km +<br>21.7 kWh / 100km                                                                              | Küfeoğlu et al. <sup>12</sup> ;<br>Zhang et al. <sup>37</sup>                                                                          |
| HEV          | Unleaded petrol E5 (L)                                 | 4.8 L / 100km                                                                                                    | Molovanoff et al. <sup>10</sup>                                                                                                        |

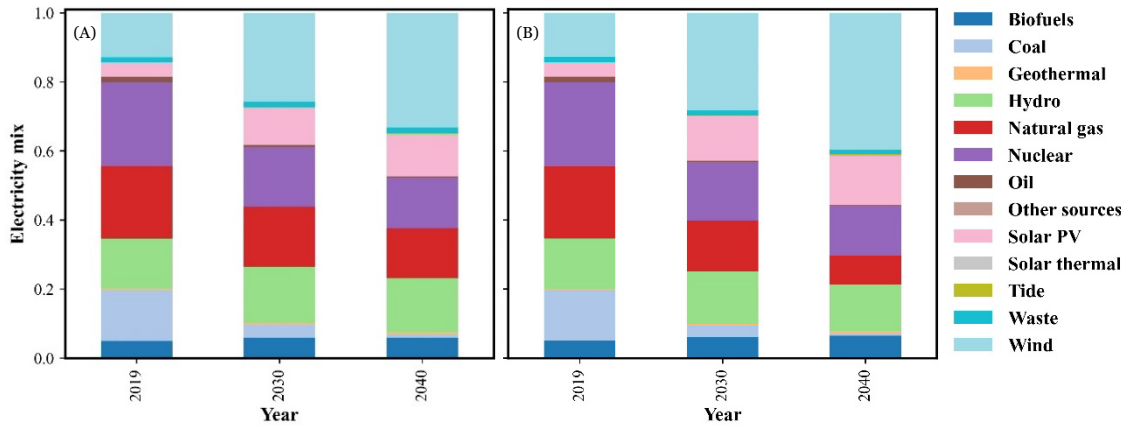

228 Figure S6. Electricity mix of the 27 EU + 3 countries in 2019, 2030 and 2040. The electricity mix in 2030 and 2040 followed the prediction  
 229 by the (A) “stated policy scenario” and (B) “sustainable development scenario” in the report from IEA<sup>31</sup>.

230

231

232 **SI.3 Uncertainty analysis**

233 A Monte Carlo analysis was used to estimate the uncertainty in future GHG emissions of the in-use passenger  
 234 vehicles from the input parameters in our model. Table S10 lists specific distributions of the related input  
 235 parameters to model the GHG emissions.

236

Table S10. Input parameters description of the uncertainty analysis

| Input parameter                    | Unit                       | Distribution | Base value                  | Value range (lower, upper)    | References                                                  |
|------------------------------------|----------------------------|--------------|-----------------------------|-------------------------------|-------------------------------------------------------------|
| Annual distance travelled          | km                         | Normal       | listed in Table S8          | ±10% of the base value        | ACEA <sup>2</sup>                                           |
| Fuel consumption of ICEVs          | L / 100 km                 | Triangular   | dynamic, listed in Table S9 | 85% to 118% of the base value | Hawkins et al. <sup>8</sup>                                 |
| Fuel consumption of HEVs           | L / 100 km                 | Triangular   | 4.8                         | 4.08 - 5.9                    | Molovanoff et al. <sup>39</sup>                             |
| Energy consumption of BEVs         | kWh / 100 km               | Triangular   | dynamic, listed in Table S9 | 96% to 106% of the base value | Zhang et al. <sup>37</sup> ; Ellingsen et al. <sup>18</sup> |
| Energy consumption of PHEVs        | L / 100 km<br>kWh / 100 km | Triangular   | 6.7<br>0.217                | 5.8 - 7.2<br>0.2 - 0.223      | Küfeoğlu et al. <sup>12</sup> ; Zhang et al. <sup>37</sup>  |
| Driving model probability of PHEVs | none                       |              | 0.5                         | 0 - 1                         |                                                             |

237

238 SI.4 Additional results

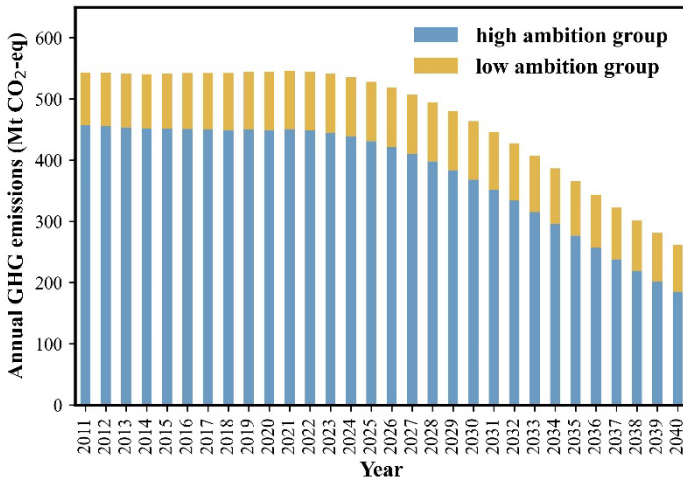

252  
253 Figure S7. Annual GHG emission (Mt CO<sub>2</sub>-eq) from driving passenger vehicles within the 27 EU + 3 countries until 2040 during the e-  
254 mobility transition under the stated policies.

255

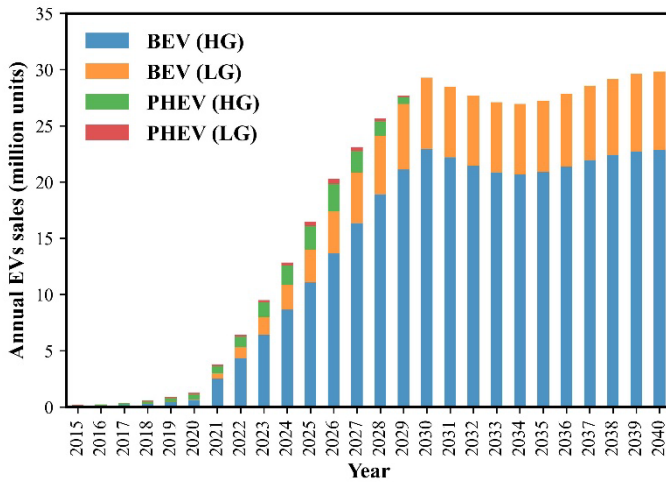

263 Figure S8. Annual BEVs and PHEVs demand (million units) under the promotion of a more ambitious e-mobility transition pace and an  
264 accelerated phase-out of ICEVs for countries in the high ambition group (HG) and the low ambition group (LG).

265

266 SI.5 Lifespan extension

267 A sensitivity analysis was performed for the ambitious transition scenario to assess how the extension of EV  
268 lifetime will influence GHG emissions. We explored two options for extending the lifespan of BEV, including:

- 269 • An **extended BEV use** from 12 years to 24 years, assuming that the replacement of EV battery would  
270 happen when the first EV battery reaches its end of life and the replaced EV battery has a lifespan of 12  
271 years;

- An **extended BEV lifespan** from 12 years to 18.4 years, representing an optimistic assumption that future EV battery technology would improve to the point of enabling BEVs to meet the historical average lifespan of the ICEVs in the high ambition group.

As shown in Figure S9, there are no major differences in GHG emissions from the manufacturing process at the early stage of the e-mobility transition (in the 2020s). Cumulative EV demand in the 2030s can decrease by 34% by expanding EV lifetimes from 12 to 24 years. This demand decrease would lead to a 615 million tons drop in manufacturing GHG emissions. Nonetheless, although an extension of lifespan for both EV batteries and BEV from 12 years to 18.4 years would lead to a 27% decrease in cumulative EV demand, it would lead to 930 million tons of GHG reductions from the manufacturing process, as it reduces the production of energy-intensive EV batteries. Longer EV battery lifespans will allow for longer EV service time and fewer EV battery replacements, contributing to greater improvement in the environmental benefits of BEV adoption.

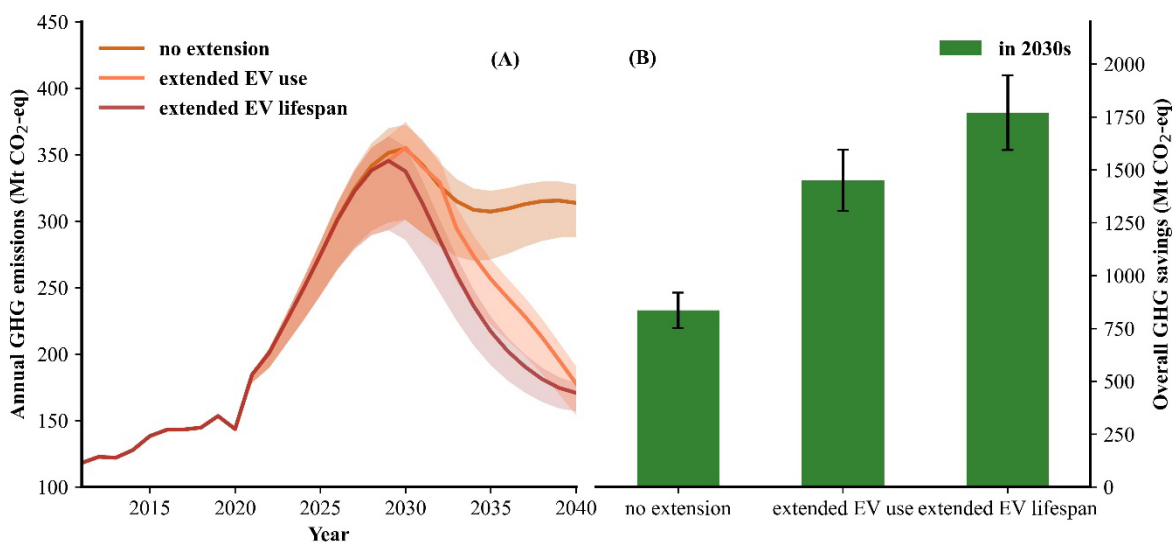

300 Figure S9. (A) Annual GHG emissions from the production of demanded passenger vehicles following different lifespan extension options  
 301 under the ambitious transition scenario. (B) Overall GHG savings (difference between driving GHG emission reductions and manufacturing  
 302 GHG emissions) in the 2030s following different lifespan extension options under the ambitious transition scenario.  
 303

304 Reference:

- 305 (1) European Commission. *Database - Eurostat*. 2017. <https://ec.europa.eu/eurostat/data/database>  
306 (accessed 2021-02-24).
- 307 (2) ACEA - European Automobile Manufacturers' Association. <https://www.acea.be/statistics> (accessed  
308 2021-02-24).
- 309 (3) Riahi, K.; van Vuuren, D. P.; Kriegler, E.; Edmonds, J.; O'Neill, B. C.; Fujimori, S.; Bauer, N.; Calvin,  
310 K.; Dellink, R.; Fricko, O.; Lutz, W.; Popp, A.; Cuaresma, J. C.; KC, S.; Leimbach, M.; Jiang, L.; Kram,  
311 T.; Rao, S.; Emmerling, J.; Ebi, K.; Hasegawa, T.; Havlik, P.; Humpenöder, F.; da Silva, L. A.; Smith, S.;  
312 Stehfest, E.; Bosetti, V.; Eom, J.; Gernaat, D.; Masui, T.; Rogelj, J.; Strefler, J.; Drouet, L.; Krey, V.;  
313 Luderer, G.; Harmsen, M.; Takahashi, K.; Baumstark, L.; Doelman, J. C.; Kainuma, M.; Klimont, Z.;  
314 Marangoni, G.; Lotze-Campen, H.; Obersteiner, M.; Tabeau, A.; Tavoni, M. The Shared Socioeconomic  
315 Pathways and Their Energy, Land Use, and Greenhouse Gas Emissions Implications: An Overview.  
316 *Global Environmental Change* **2017**, *42*, 153–168. <https://doi.org/10.1016/j.gloenvcha.2016.05.009>.
- 317 (4) *SSP Database*. <https://tntcat.iiasa.ac.at/SspDb/dsd?Action=htmlpage&page=10> (accessed 2020-11-  
318 01).
- 319 (5) Held, M.; Rosat, N.; Georges, G.; Pengg, H.; Boulouchos, K. Lifespans of Passenger Cars in Europe:  
320 Empirical Modelling of Fleet Turnover Dynamics. *European Transport Research Review* **2021**, *13* (1).  
321 <https://doi.org/10.1186/S12544-020-00464-0>.
- 322 (6) Harper, G.; Sommerville, R.; Kendrick, E.; Driscoll, L.; Slater, P.; Stolkin, R.; Walton, A.; Christensen,  
323 P.; Heidrich, O.; Lambert, S.; Abbott, A.; Ryder, K.; Gaines, L.; Anderson, P. Recycling Lithium-Ion  
324 Batteries from Electric Vehicles. *Nature*. 2019, pp 75–86. <https://doi.org/10.1038/s41586-019-1682-5>.
- 325 (7) Campestrini, M.; Mock, P. European Vehicle Market Statistics. *International Council on Clean*  
326 *Transportation* **2021**, 1–50.
- 327 (8) Hawkins, T. R.; Singh, B.; Majeau-Bettez, G.; Strømman, A. H. Comparative Environmental Life Cycle  
328 Assessment of Conventional and Electric Vehicles. *J Ind Ecol* **2013**, *17* (1), 53–64.  
329 <https://doi.org/10.1111/j.1530-9290.2012.00532.x>.



- 330 (9) Kim, H. C.; Wallington, T. J.; Arsenault, R.; Bae, C.; Ahn, S.; Lee, J. Cradle-to-Gate Emissions from a  
331 Commercial Electric Vehicle Li-Ion Battery: A Comparative Analysis. *Environ Sci Technol* **2016**, *50*  
332 (14), 7715–7722. <https://doi.org/10.1021/acs.est.6b00830>.
- 333 (10) Milovanoff, A.; Kim, H. C.; De Kleine, R.; Wallington, T. J.; Posen, I. D.; MacLean, H. L. A Dynamic  
334 Fleet Model of U.S Light-Duty Vehicle Lightweighting and Associated Greenhouse Gas Emissions from  
335 2016 to 2050. *Environ Sci Technol* **2019**, *53* (4), 2199–2208.  
336 <https://doi.org/10.1021/acs.est.8b04249>.
- 337 (11) Nealer, R.; Hendrickson, T. P. Review of Recent Lifecycle Assessments of Energy and Greenhouse Gas  
338 Emissions for Electric Vehicles. *Current Sustainable/Renewable Energy Reports* **2015**, *2* (3), 66–73.  
339 <https://doi.org/10.1007/s40518-015-0033-x>.
- 340 (12) Küfeoğlu, S.; Khah Kok Hong, D. Emissions Performance of Electric Vehicles: A Case Study from the  
341 United Kingdom. *Appl Energy* **2020**, *260*, 114241. <https://doi.org/10.1016/j.apenergy.2019.114241>.
- 342 (13) Notter, D. A.; Gauch, M.; Widmer, R.; Wäger, P.; Stamp, A.; Zah, R.; Althaus, H. J. Contribution of Li-  
343 Ion Batteries to the Environmental Impact of Electric Vehicles. *Environ Sci Technol* **2010**, *44* (17),  
344 6550–6556. <https://doi.org/10.1021/es903729a>.
- 345 (14) Moreno Ruiz E., F. D. , S. A. , I. D. , Müller J. , V. L. , V. C. , M. N. , S. T. Documentation of  
346 Changes Implemented in the Ecoinvent Database v3.8. **2021**.
- 347 (15) *Top electric vehicle markets dominate lithium-ion battery capacity growth | S&P Global Market*  
348 *Intelligence*. [https://www.spglobal.com/marketintelligence/en/news-insights/blog/top-electric-](https://www.spglobal.com/marketintelligence/en/news-insights/blog/top-electric-vehicle-markets-dominate-lithium-ion-battery-capacity-growth)  
349 [vehicle-markets-dominate-lithium-ion-battery-capacity-growth](https://www.spglobal.com/marketintelligence/en/news-insights/blog/top-electric-vehicle-markets-dominate-lithium-ion-battery-capacity-growth) (accessed 2021-04-01).
- 350 (16) Delogu, M.; Zanchi, L.; Dattilo, C. A.; Pierini, M. Innovative Composites and Hybrid Materials for  
351 Electric Vehicles Lightweight Design in a Sustainability Perspective. *Mater Today Commun* **2017**, *13*,  
352 192–209. <https://doi.org/10.1016/j.mtcomm.2017.09.012>.
- 353 (17) Li, J.; Yang, B. Analysis of Greenhouse Gas Emissions from Electric Vehicle Considering Electric  
354 Energy Structure, Climate and Power Economy of Ev: A China Case. *Atmos Pollut Res* **2020**, *11* (6), 1–  
355 11. <https://doi.org/10.1016/j.apr.2020.02.019>.

- 356 (18) Ellingsen, L. A.-W.; Singh, B.; Strømman, A. H. The Size and Range Effect: Lifecycle Greenhouse Gas  
357 Emissions of Electric Vehicles. *Environmental Research Letters* **2016**, *11* (5), 054010.  
358 <https://doi.org/10.1088/1748-9326/11/5/054010>.
- 359 (19) Notter, D. A.; Gauch, M.; Widmer, R.; Wäger, P.; Stamp, A.; Zah, R.; Althaus, H.-J. Contribution of Li-  
360 Ion Batteries to the Environmental Impact of Electric Vehicles. *Environ Sci Technol* **2010**, *44* (17),  
361 6550–6556. <https://doi.org/10.1021/es903729a>.
- 362 (20) Hawkins, T. R.; Singh, B.; Majeau-Bettez, G.; Strømman, A. H. Comparative Environmental Life Cycle  
363 Assessment of Conventional and Electric Vehicles. *J Ind Ecol* **2013**, *17* (1), 53–64.  
364 <https://doi.org/10.1111/j.1530-9290.2012.00532.x>.
- 365 (21) Sun, X.; Luo, X.; Zhang, Z.; Meng, F.; Yang, J. Life Cycle Assessment of Lithium Nickel Cobalt  
366 Manganese Oxide (NCM) Batteries for Electric Passenger Vehicles. *J Clean Prod* **2020**, *273*.  
367 <https://doi.org/10.1016/j.jclepro.2020.123006>.
- 368 (22) Dai, Q.; Kelly, J. C.; Gaines, L.; Wang, M. Life Cycle Analysis of Lithium-Ion Batteries for Automotive  
369 Applications. *Batteries* **2019**, *5* (2), 48. <https://doi.org/10.3390/batteries5020048>.
- 370 (23) Peters, J. F.; Baumann, M.; Zimmermann, B.; Braun, J.; Weil, M. *The Environmental Impact of Li-Ion*  
371 *Batteries and the Role of Key Parameters – A Review*; Pergamon, 2017; Vol. 67, pp 491–506.  
372 <https://doi.org/10.1016/j.rser.2016.08.039>.
- 373 (24) Milovanoff, A.; Posen, I. D.; MacLean, H. L. Electrification of Light-Duty Vehicle Fleet Alone Will Not  
374 Meet Mitigation Targets. *Nat Clim Chang* **2020**, *10* (12), 1102–1107. [https://doi.org/10.1038/s41558-](https://doi.org/10.1038/s41558-020-00921-7)  
375 [020-00921-7](https://doi.org/10.1038/s41558-020-00921-7).
- 376 (25) Majeau-Bettez, G.; Hawkins, T. R.; Strømman, A. H. Life Cycle Environmental Assessment of Lithium-  
377 Ion and Nickel Metal Hydride Batteries for Plug-in Hybrid and Battery Electric Vehicles. *Environ Sci*  
378 *Technol* **2011**, *45* (10), 4548–4554. <https://doi.org/10.1021/es103607c>.
- 379 (26) Dai, Q.; Kelly, J. C.; Gaines, L.; Wang, M. Life Cycle Analysis of Lithium-Ion Batteries for Automotive  
380 Applications. *Batteries 2019, Vol. 5, Page 48* **2019**, *5* (2), 48.  
381 <https://doi.org/10.3390/BATTERIES5020048>.

- 382 (27) Ellingsen, L. A. W.; Hung, C. R.; Strømman, A. H. Identifying Key Assumptions and Differences in Life  
383 Cycle Assessment Studies of Lithium-Ion Traction Batteries with Focus on Greenhouse Gas Emissions.  
384 *Transp Res D Transp Environ* **2017**, *55*, 82–90. <https://doi.org/10.1016/j.trd.2017.06.028>.
- 385 (28) Onat, N. C.; Kucukvar, M.; Aboushaqrah, N. N. M.; Jabbar, R. How Sustainable Is Electric Mobility? A  
386 Comprehensive Sustainability Assessment Approach for the Case of Qatar. *Appl Energy* **2019**, *250*,  
387 461–477. <https://doi.org/10.1016/j.apenergy.2019.05.076>.
- 388 (29) *Asian Batteries Power Global EV Fleet*. [https://www.statista.com/chart/26584/worldwide-market-](https://www.statista.com/chart/26584/worldwide-market-share-of-the-biggest-electric-vehicle-battery-makers/)  
389 [share-of-the-biggest-electric-vehicle-battery-makers/](https://www.statista.com/chart/26584/worldwide-market-share-of-the-biggest-electric-vehicle-battery-makers/) (accessed 2022-03-31).
- 390 (30) International Energy Agency. *Data & Statistics - IEA*. Electricity Information.  
391 <https://www.iea.org/data-and-statistics?country=WORLD&fuel=Energy>  
392 [supply&indicator=TPESbySource](https://www.iea.org/data-and-statistics?country=WORLD&fuel=Energy) (accessed 2021-02-24).
- 393 (31) Cozzi, L.; Gould, T.; Bouckart, S.; Crow, D.; Kim, T.-Y.; McGlade, C.; Olejarnik, P.; Wanner, B.; Wetzel,  
394 D. World Energy Outlook 2020. **2020**, *2050* (October), 1–461.
- 395 (32) Schlömer S.; T. Bruckner, L.; Fulton A. McKinnon D. Perczyk J. Roy R. Schaeffer R. Sims P. Smith and  
396 R. Wiser, E. H. *Annex III: Technology-Specific Cost and Performance Parameters in Climate Change*  
397 *2014: Mitigation of Climate Change. Contribution of Working Group III to the Fifth Assessment*  
398 *Report of the Intergovernmental Panel on Climate Change; 2014*.
- 399 (33) Tang, C.; Sprecher, B.; Tukker, A.; Mogollón, J. M. The Impact of Climate Policy Implementation on  
400 Lithium, Cobalt and Nickel Demand: The Case of the Dutch Automotive Sector up to 2040. *Resources*  
401 *Policy* **2021**, *74*, 102351. <https://doi.org/10.1016/J.RESOURPOL.2021.102351>.
- 402 (34) Usón, A. A.; Capilla, A. V.; Bribián, I. Z.; Scarpellini, S.; Sastresa, E. L. Energy Efficiency in Transport  
403 and Mobility from an Eco-Efficiency Viewpoint. *Energy* **2011**, *36* (4), 1916–1923.  
404 <https://doi.org/10.1016/j.energy.2010.05.002>.
- 405 (35) Sihvonen, J.; Mathieu, L. *Mission (Almost) Accomplished; 2020*.
- 406 (36) *Data and maps — European Environment Agency*. <https://www.eea.europa.eu/data-and-maps>  
407 (accessed 2021-02-24).

- 408 (37) Zhang, C.; Yang, F.; Ke, X.; Liu, Z.; Yuan, C. Predictive Modeling of Energy Consumption and  
409 Greenhouse Gas Emissions from Autonomous Electric Vehicle Operations. *Appl Energy* **2019**, *254*.  
410 <https://doi.org/10.1016/j.apenergy.2019.113597>.
- 411 (38) Cox, B.; Bauer, C.; Mendoza Beltran, A.; van Vuuren, D. P.; Mutel, C. L. Life Cycle Environmental and  
412 Cost Comparison of Current and Future Passenger Cars under Different Energy Scenarios. *Appl*  
413 *Energy* **2020**, *269*. <https://doi.org/10.1016/j.apenergy.2020.115021>.
- 414 (39) Milovanoff, A.; Kim, H. C.; De Kleine, R.; Wallington, T. J.; Daniel Posen, I.; Maclean, H. L.  
415 *Supporting Information: A Dynamic Fleet Model of U.S Light-Duty Vehicle Lightweighting and*  
416 *Associated Greenhouse Gas Emissions from 2016-2050*.
- 417
